# Supplementary material for: Electrochemical performances of a LiFePO4-based heat-treated activated carbon electrode
Source: Royal Society of Chemistry journal article supplement (doi:10.1039/d2cc01709a), 2022-01-01
Supplement: d2cc01709a1.pdf [file d2cc01709a1.pdf]

## Electronic Supplementary Information

# Electrochemical Performances of LiFePO<sub>4</sub>-based Heat-treated activated carbon Electrode

Jihyeon Ryu<sup>a,b</sup>, Sunhye Yang<sup>a</sup>, Jongkyu Back<sup>a,c</sup>, Seungwook Eom<sup>a</sup>, and Ick-Jun Kim<sup>a\*</sup>

<sup>a</sup> Next Generation Battery Research Center, Korea Electrotechnology Research Institute (KERI), Changwon 51543, Republic of Korea

<sup>b</sup> Department of Electro-Functionality Materials Engineering, University of Science & Technology (UST), Daejeon 34113, Republic of Korea

<sup>c</sup> School of material science and engineering, Pusan national university, 2, Busandaehak-ro 63beon-gil, Geumjeong-gu, Busan, Republic of Korea

## Experimental

### Heat-treatment of activated carbon

Activated carbon was prepared by the H<sub>3</sub>PO<sub>4</sub>-activation of wood-based raw materials and was supplied by Power Carbon Technology Ltd. To vary the surface conditions and pore structure, the activated carbon was heat-treated at 500°C, 700°C, 1000°C, and 1300°C in an inert atmosphere for 1h. The non-heat-treated and heat-treated activated carbon at various temperatures were referred to as AC, AC-500, AC-700, AC-1000, and AC-1300.

### Analyses of activated carbon

The shape and surface of the activated carbon were observed using field-emission scanning electron microscopy (FE-SEM) (Hitachi, S-4800). The nitrogen adsorption-desorption isotherm was evaluated at -196 °C using a BELSORP-Max (MacrotracBEL). The specific surface area was calculated using the Brunauer-Emmett-Teller (BET) method. The pore volume and average pore size were calculated using the Barrett-Joyner-Halenda (BJH) method. The functional groups present on the surface of the activated carbon were analyzed using high-performance X-ray photoelectron spectroscopy (XPS) (K-Alpha).

### Fabrication of electrodes and half cells

Activated carbon and LiFePO<sub>4</sub> (P600A, Pulead) were used together as the active materials. Hereinafter, active materials are referred to as LFP. LiFePO<sub>4</sub> and activated carbon were mixed in a ratio of 95:5 (wt.%). LFP or the active materials were combined with carbon black (CB) and polyvinylidene fluoride (PVDF, Solvay) in a ratio of 85:10:5 (wt.%) to prepare slurries. These slurries were coated with Al foil and vacuum-dried at 120 °C for 12h. The dried electrodes were roll-pressed to achieve an electrode thickness of 60 μm. The electrodes cut in 2.5 × 2.5 cm<sup>2</sup> were used as working electrodes, and lithium foil was used as a counter electrode. A separator was placed between the electrodes to assemble the pouch cell. An electrolyte was prepared and used by dissolving 1 M LiPF<sub>6</sub> in a solvent containing ethylene carbonate (EC) and ethyl methyl carbonate (EMC) in a volumetric ratio of 3:7.

### Evaluations of electrodes and half cells

The active material resistance (Ωcm) of the electrodes was calculated by measuring the multi-probe resistance (RM2610, HIOKI) and dividing it by the electrode thickness. The capacity, C-rate, and cycle characteristics of the electrodes were evaluated using the charge-discharge tester (Maccor, MC-4) over the voltage range of 2.5–4.2

V at 25°C. The capacities of the activated carbon and LFP were obtained in the voltage region of the voltage profiles, and the gravimetric capacitance ( $\text{Fg}^{-1}$ ) of the activated carbon was calculated at the initial discharge slope using the following equation:

$$C = \frac{i\Delta t}{\Delta V}$$

where  $\Delta t$  represents the time period,  $\Delta V$  represents the voltage change, and  $i$  represents the constant discharge current.

The C-rate characteristics were measured by charging at 0.2 C and discharging in the current range of 0.2–10 C, and the charge-discharge cycle characteristics were measured by repeating 0.2 C charges and 0.5 C discharges.

AC impedance analysis of the electrodes was performed using an impedance analyzer (Wonatech MP2) within a frequency range of 5 mHz–10 MHz and at an amplitude of 10 mV.

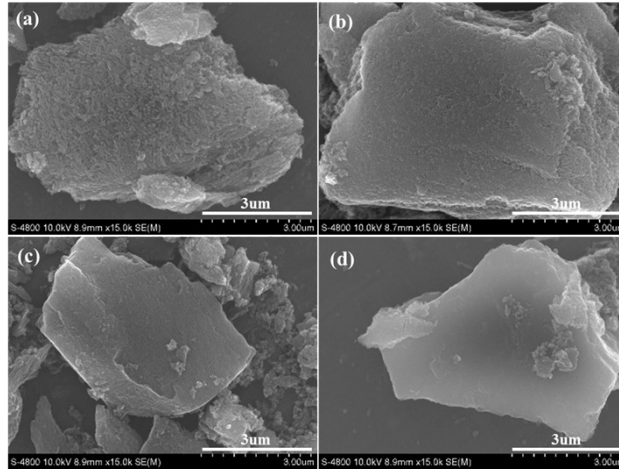

Fig. S1 SEM images of (a) AC, (b) AC-500, (c) AC-1000 and (d) AC-1300.

Fig. S1 Porosimetric features of AC-HTT as obtained from the analysis of nitrogen adsorption/desorption isotherms ;  $S_{BET}$  : surface area,  $V_{tot}$  : total pore volume,  $r_{avg}$  : mean pore diameter,  $V_{micro}$  : micropore volume,  $V_{meso}$  : mesopore volume,  $V_{micro}/V_{tot}$  : micropore volume percent.

| Activated carbon | $S_{BET}$ [m <sup>2</sup> /g] | $V_{tot}$ [cm <sup>3</sup> /g] | $r_{avg}$ [nm] | $V_{micro}$ [cm <sup>3</sup> /g] | $V_{meso}$ [cm <sup>3</sup> /g] | $V_{micro}/V_{tot}$ [%] |
|------------------|-------------------------------|--------------------------------|----------------|----------------------------------|---------------------------------|-------------------------|
| AC               | 1466.5                        | 1.232                          | 3.36           | 0.396                            | 0.835                           | 32                      |
| AC-500           | 1460.1                        | 1.257                          | 3.44           | 0.408                            | 0.849                           | 32                      |
| AC-700           | 1338.5                        | 1.122                          | 3.35           | 0.378                            | 0.743                           | 34                      |
| AC-1000          | 1201.6                        | 0.978                          | 3.26           | 0.353                            | 0.625                           | 36                      |
| AC-1300          | 1149.9                        | 0.971                          | 3.38           | 0.331                            | 0.640                           | 34                      |
